# Supplementary material for: A Rapid Bioassay Test for Assessing Environmental Contamination Using the Marine Sedentary Polychaete Hydroides elegans
Source: MDPI journal article supplement (doi:10.3390/w14111713), 2022-05-26
Supplement: s1 [file s1]

# A Rapid Bioassay Test for Assessing Environmental Contamination Using the Marine Sedentary Polychaete *Hydroides elegans*

Priya Sivakumar <sup>1,†</sup>, Gomathi Srinivasan <sup>1,†</sup>, Madhuvandhi Janardhanam <sup>1</sup>, Rekha Sivakumar <sup>1</sup>, Priscilla Niranjani Marcus <sup>1</sup>, Sujatha Balasubramaniam <sup>1</sup>, Gopalakrishnan Singaram <sup>2</sup> and Thilagam Harikrishnan <sup>1,\*</sup>

<sup>1</sup> Postgraduate and Research Department of Zoology, Pachaiyappa's College for Men, Chennai 600030, India; priyasivakumar400@gmail.com (P.S.), gomathikarthick18@gmail.com (G.S.), madhujanardhanam@gmail.com (M.J.), rekhassivakumar698@gmail.com (R.S.), priscillaniranjani@gmail.com (P.N.M.), lbsujatha@gmail.com (S.B.),

<sup>2</sup> eProov Assessment Solution PVT Limited, Chennai 600035, India; gopalthilagam@gmail.com

\* Correspondence: Author: thilagampachaiyappas@gmail.com

† Authors made equal contributions

**Table S1.** Varimax rotated<sup>a</sup> factor loadings and communality of contaminants and bioassay test.

| Parameters<br>(mg/L)                          | VF1         | VF2         | VF3         | Communalities |
|-----------------------------------------------|-------------|-------------|-------------|---------------|
| Cu (mg/L)                                     | −0.06       | <b>0.81</b> | −0.18       | 0.69          |
| Cd (mg/L)                                     | 0.26        | <b>0.83</b> | 0.16        | 0.78          |
| Co (mg/L)                                     | 0.21        | <b>0.92</b> | 0.11        | 0.91          |
| Cr (mg/L)                                     | −0.01       | <b>0.94</b> | −0.10       | 0.89          |
| Pb (mg/L)                                     | 0.48        | 0.56        | 0.38        | 0.69          |
| Zn (mg/L)                                     | 0.17        | <b>0.94</b> | 0.20        | 0.95          |
| Ni (mg/L)                                     | 0.72        | 0.20        | 0.42        | 0.74          |
| Hg (mg/L)                                     | 0.10        | 0.93        | −0.07       | 0.87          |
| Fe (mg/L)                                     | −0.30       | −0.03       | <b>0.93</b> | 0.96          |
| TPH (µg/L)                                    | 0.26        | <b>0.86</b> | −0.01       | 0.81          |
| Fertilization Membrane Stage (Egg bioassay)   | <b>0.92</b> | 0.17        | −0.18       | 0.91          |
| 2-Cell stage (Egg bioassay)                   | <b>0.94</b> | 0.21        | −0.13       | 0.94          |
| 4-Cell stage (Egg bioassay)                   | <b>0.95</b> | 0.19        | −0.07       | 0.95          |
| Blastula stage (Egg bioassay)                 | <b>0.94</b> | 0.13        | −0.06       | 0.90          |
| Fertilization Membrane Stage (Sperm bioassay) | <b>0.98</b> | 0.13        | −0.03       | 0.97          |
| 2-Cell stage (Sperm bioassay)                 | <b>0.96</b> | 0.07        | 0.00        | 0.93          |
| 4-Cell stage (Sperm bioassay)                 | <b>0.97</b> | 0.05        | −0.02       | 0.95          |
| Blastula stage (Sperm bioassay)               | <b>0.94</b> | 0.13        | −0.01       | 0.90          |
| Eigen values                                  | 9.704       | 4.700       | 1.338       |               |
| % of variance                                 | 53.909      | 26.112      | 7.435       |               |
| Cumulative                                    | 53.909      | 80.20       | 87.455      |               |
| KMO sampling adequacy                         |             | 0.719       |             |               |

Extraction Method: Principal Component Analysis. Rotation method: Varimax with Kaiser normalization. Bold values indicate strong loadings<sup>a</sup> Rotation converged in 4 iterations.
